# Supplementary material
Source: PubMed Central journal article supplement (PMC8767493)
Supplement: jamapediatr-e215547-s003.pdf [file jamapediatr-e215547-s003.pdf]

\*Indicates required information. Only first name, last name, and suffix will appear in PubMed.

| <b>*Group Name(s): The DMID 14-0079 Study Team</b> |                   |                              |                  |                                                                                                                                      |                                          |                                                         |                                                                                            |
|----------------------------------------------------|-------------------|------------------------------|------------------|--------------------------------------------------------------------------------------------------------------------------------------|------------------------------------------|---------------------------------------------------------|--------------------------------------------------------------------------------------------|
| <b>*First Name and Middle Initial(s)</b>           | <b>*Last Name</b> | <b>*Suffix (eg, Jr, III)</b> | Academic Degrees | Institution                                                                                                                          | Location (city, state/province, country) | Role or Contribution, eg, chair, principal investigator | Group (if more than 1 Group listed in the byline) and/or Subgroup (eg, Steering Committee) |
| Gysella B                                          | Muniz             |                              | MD               | Department of Pediatrics, University of Pittsburgh School of Medicine and the UPMC Children's Hospital of Pittsburgh, Pittsburgh, PA | Pittsburgh, PA                           | Investigator                                            |                                                                                            |
| Timothy R                                          | Shope             |                              | MD, MPH          | Department of Pediatrics, University of Pittsburgh School of Medicine and the UPMC Children's Hospital of Pittsburgh, Pittsburgh, PA | Pittsburgh, PA                           | Investigator                                            |                                                                                            |
| Sonika                                             | Bhatnagar         |                              | MD, MPH          | Department of Pediatrics, University of Pittsburgh School of Medicine and the UPMC Children's Hospital of Pittsburgh, Pittsburgh, PA | Pittsburgh, PA                           | Investigator                                            |                                                                                            |
| Nader                                              | Shaikh            |                              | MD, MPH          | Department of Pediatrics, University of Pittsburgh School of Medicine and the UPMC Children's Hospital of Pittsburgh, Pittsburgh, PA | Pittsburgh, PA                           | Investigator                                            |                                                                                            |
|                                                    |                   |                              |                  |                                                                                                                                      |                                          |                                                         |                                                                                            |
| Cindy                                              | Terill            |                              | BS               | Department of Pediatrics, Washington University in St. Louis School of Medicine, St. Louis, MO                                       | St. Louis, MO                            | Project Manager                                         |                                                                                            |

Supplemental Online Content: Nonauthor Collaborators

\*Indicates required information. Only first name, last name, and suffix will appear in PubMed.

| <b>*First Name and Middle Initial(s)</b> | <b>*Last Name</b> | <b>*Suffix (eg, Jr, III)</b> | Academic Degrees | Institution                                                                                               | Location (city, state/province, country) | Role or Contribution, eg, chair, principal investigator | Group (if more than 1 Group listed in the byline) and/or Subgroup (eg, Steering Committee) |
|------------------------------------------|-------------------|------------------------------|------------------|-----------------------------------------------------------------------------------------------------------|------------------------------------------|---------------------------------------------------------|--------------------------------------------------------------------------------------------|
| Christina                                | Krucylak          |                              | BS               | Department of Pediatrics, Washington University in St. Louis School of Medicine, St. Louis, MO            | St. Louis, MO                            | Coordinator                                             |                                                                                            |
| Stephanie A                              | Fritz             |                              | MD, MSCI         | Department of Pediatrics, Washington University in St. Louis School of Medicine, St. Louis, MO            | St. Louis, MO                            | Investigator                                            |                                                                                            |
|                                          |                   |                              |                  |                                                                                                           |                                          |                                                         |                                                                                            |
| David W                                  | Kimberlin         |                              | MD               | University of Alabama, Birmingham                                                                         | Birmingham, AL                           | Investigator                                            |                                                                                            |
|                                          |                   |                              |                  |                                                                                                           |                                          |                                                         |                                                                                            |
| Michael J                                | Smith             |                              | MD, MSCE         | Department of Pediatrics and Duke Human Vaccine Institute, Duke University School of Medicine, Durham, NC | Durham, NC                               | Investigator                                            |                                                                                            |
| Matthew S                                | Kelly             |                              | MD, MPH          | Department of Pediatrics and Duke Human Vaccine Institute, Duke University School of Medicine, Durham, NC | Durham, NC                               | Investigator                                            |                                                                                            |
| M. Anthony                               | Moody             |                              | MD               | Department of Pediatrics and Duke Human Vaccine Institute, Duke University School of Medicine, Durham, NC | Durham, NC                               | Investigator                                            |                                                                                            |
|                                          |                   |                              |                  |                                                                                                           |                                          |                                                         |                                                                                            |

## Supplemental Online Content: Nonauthor Collaborators

\*Indicates required information. Only first name, last name, and suffix will appear in PubMed.

| <b>*First Name and Middle Initial(s)</b> | <b>*Last Name</b> | <b>*Suffix (eg, Jr, III)</b> | Academic Degrees | Institution                                                                                                                                                                               | Location (city, state/province, country) | Role or Contribution, eg, chair, principal investigator | Group (if more than 1 Group listed in the byline) and/or Subgroup (eg, Steering Committee) |
|------------------------------------------|-------------------|------------------------------|------------------|-------------------------------------------------------------------------------------------------------------------------------------------------------------------------------------------|------------------------------------------|---------------------------------------------------------|--------------------------------------------------------------------------------------------|
| Isaac P                                  | Thomsen           |                              | MD, MSCI         | Department of Pediatrics and the Vanderbilt Vaccine Research Program, Vanderbilt University School of Medicine and the Monroe Carell Jr. Children's Hospital at Vanderbilt, Nashville, TN | Nashville, TN                            | Investigator                                            |                                                                                            |
| Susan E                                  | Coffin            |                              | MD, MPH          | Children's Hospital of Philadelphia; Department of Pediatrics, Perelman School of Medicine at the University of Pennsylvania                                                              | Philadelphia, PA                         | Investigator                                            |                                                                                            |
| Kevin J                                  | Downes            |                              | MD.              | Children's Hospital of Philadelphia; Department of Pediatrics, Perelman School of Medicine at the University of Pennsylvania                                                              | Philadelphia, PA                         | Investigator                                            |                                                                                            |
| Brian T                                  | Fisher            |                              | DO, MSCE         | Children's Hospital of Philadelphia; Department of Pediatrics, Perelman School of Medicine at the University of Pennsylvania                                                              | Philadelphia, PA                         | Investigator                                            |                                                                                            |
| Jamison                                  | McCorrison        |                              | PhD              | The Emmes Company, LLC, Rockville, MD                                                                                                                                                     | Rockville, MD                            | Biostatistician                                         |                                                                                            |
| Kian                                     | Ghaffari          |                              | MS               | The Emmes Company, LLC, Rockville, MD                                                                                                                                                     | Rockville, MD                            | Biostatistician                                         |                                                                                            |
