# Supplementary material
Source: PubMed Central journal article supplement (PMC8767493)
Supplement: jamapediatr-e215547-s004.pdf [file jamapediatr-e215547-s004.pdf]

## Data Sharing Statement

Williams. Short- vs Standard-Course Outpatient Antibiotic Therapy for Community-Acquired Pneumonia in Children. *JAMA Pediatr.* Published January 18, 2022.  
doi:10.1001/jamapediatrics.2021.5547

### Data

**Data available:** No

### Additional Information

**Explanation for why data not available:** n/a
